# Supplementary material for: Risk factors for structural and functional progression of primary open-angle glaucoma in an African ancestry cohort
Source: HighWire-hosted journal article supplement (doi:10.1136/bmjophth-2022-001120), 2023-03-01
Supplement: bmjophth-2022-001120supp001_data_supplement.pdf [file bmjophth-2022-001120supp001_data_supplement.pdf]

**Table 1:** Univariable analysis of demographic risk factors for being a fast structural progressor

|                                        | levels  | # of eyes | # of fast progressors (%) | OR (95% CI)      | P value |
|----------------------------------------|---------|-----------|---------------------------|------------------|---------|
| Age (years)                            | <=60    | 304       | 87 (28.62%)               | Ref              | 0.304   |
|                                        | (60,70] | 415       | 122 (29.40%)              | 1.05 (0.75,1.47) |         |
|                                        | >70     | 609       | 154 (25.29%)              | 0.84 (0.61,1.16) |         |
|                                        | Missing | 96        | 26 (27.08%)               | -                |         |
| Age (per 10 year increase)             |         |           |                           | 0.88 (0.78,0.99) | 0.033   |
| Sex                                    | Male    | 648       | 176 (27.16%)              | Ref              | 0.934   |
|                                        | Female  | 772       | 211 (27.33%)              | 1.01 (0.79,1.29) |         |
|                                        | Missing | 4         | 2 (50.00%)                | -                |         |
| BMI group                              | < 25    | 262       | 72 (27.48%)               | Ref              | 0.949   |
|                                        | 25-30   | 466       | 132 (28.33%)              | 1.04 (0.74,1.47) |         |
|                                        | >=30    | 563       | 154 (27.35%)              | 0.99 (0.72,1.38) |         |
|                                        | Missing | 133       | 31 (23.31%)               | -                |         |
| BMI (per 1 kg/m <sup>2</sup> increase) |         |           |                           | 1.00 (0.98,1.02) | 0.807   |
| Diabetes                               | No      | 735       | 212 (28.84%)              | Ref              | 0.266   |
|                                        | Yes     | 558       | 145 (25.99%)              | 0.86 (0.67,1.12) |         |
|                                        | Missing | 131       | 32 (24.43%)               | -                |         |
| Hypertension                           | No      | 228       | 67 (29.39%)               | Ref              | 0.509   |
|                                        | Yes     | 1067      | 290 (27.18%)              | 0.90 (0.65,1.23) |         |
|                                        | Missing | 129       | 32 (24.81%)               | -                |         |
| Family glaucoma history                | No      | 487       | 146 (29.98%)              | Ref              | 0.207   |
|                                        | Yes     | 713       | 189 (26.51%)              | 0.84 (0.65,1.10) |         |
|                                        | Missing | 224       | 54 (24.11%)               | -                |         |
| Alcohol use                            | No      | 569       | 148 (26.01%)              | Ref              | 0.264   |
|                                        | Yes     | 661       | 191 (28.90%)              | 1.16 (0.89,1.50) |         |
|                                        | Missing | 194       | 50 (25.77%)               | -                |         |
| Tobacco use                            | No      | 538       | 143 (26.58%)              | Ref              | 0.557   |
|                                        | Yes     | 694       | 195 (28.10%)              | 1.08 (0.83,1.40) |         |
|                                        | Missing | 192       | 51 (26.56%)               | -                |         |
| Previous glaucoma surgery              | No      | 895       | 257 (28.72%)              | Ref              | 0.301   |
|                                        | Yes     | 383       | 99 (25.85%)               | 0.86 (0.65,1.15) |         |
|                                        | Missing | 146       | 33 (22.60%)               | -                |         |
| <i>LMX1B</i>                           | GC      | 27        | 8 (29.63%)                | Ref              | 0.64    |

|               |         |      |              |                      |      |
|---------------|---------|------|--------------|----------------------|------|
|               | GG      | 1127 | 297 (26.35%) | 0.85<br>(0.45, 1.61) |      |
|               | Missing | 270  | 84 (31.11%)  | -                    |      |
| <i>TRIM66</i> | TC      | 146  | 40 (27.40%)  | Ref                  | 0.83 |
|               | TT      | 1004 | 264 (26.29%) | 0.95<br>(0.62, 1.46) |      |
|               | Missing | 274  | 85 (31.02%)  | -                    |      |

OR=odds ratio; CI=confidence interval; BMI=body mass index

**Table 2:** Univariable analysis of ocular risk factors for being a fast structural progressor

|                                | # of eyes | # of fast progressors (%) | OR (95% CI)      | P value |
|--------------------------------|-----------|---------------------------|------------------|---------|
| CCT (per 10 $\mu$ m/increase)  | 1228      | 323 (26.30%)              | 1.02 (0.98,1.05) | 0.318   |
| CDR (per 0.1 increase)         | 863       | 217 (25.14%)              | 0.76 (0.70,0.83) | <.001   |
| IOP (per 1 mmHg increase)      | 1148      | 294 (25.61%)              | 1.00 (0.98,1.02) | 0.940   |
| MD (per 1 dB increase)         | 1004      | 243 (24.20%)              | 1.08 (1.05,1.11) | <.001   |
| PSD (per 1 dB increase)        | 1001      | 242 (24.18%)              | 0.84 (0.80,0.89) | <.001   |
| RNFL (per 10 $\mu$ m/increase) | 1424      | 389 (27.32%)              | 2.65 (2.35,3.00) | <.001   |
| VA (per 0.1 logMAR increase)   | 727       | 178 (24.48%)              | 0.96 (0.88,1.06) | 0.426   |

OR=odds ratio; CI=confidence interval; CCT=central corneal thickness; CDR=cup-to-disc ratio; IOP=intraocular pressure; MD=mean deviation; PSD=pattern standard deviation; RNFL=retinal nerve fiber layer thickness; VA=visual acuity

**Table 3:** Univariable analysis of qualitative phenotype risk factors for being a fast structural progressor

|                                         |             | # of eyes | # of fast progressors (%) | OR (95% CI)      | P value |
|-----------------------------------------|-------------|-----------|---------------------------|------------------|---------|
| Disc shape                              | Round       | 243       | 60 (24.69%)               | Reference        | 0.402   |
|                                         | Oval        | 237       | 72 (30.38%)               | 1.34 (0.88,2.04) |         |
|                                         | Missing     | 944       | 257 (27.22%)              | 1.13 (0.81,1.58) |         |
| Disc Size                               | Recorded    | 482       | 132 (27.39%)              | Reference        | 0.907   |
|                                         | Missing     | 942       | 257 (27.28%)              | 0.98 (0.76,1.27) |         |
| Shape of cup                            | Conical     | 156       | 47 (30.13%)               | Reference        | 0.438   |
|                                         | Cylindrical | 256       | 69 (26.95%)               | 0.86 (0.54,1.35) |         |
|                                         | Bean Pot    | 62        | 12 (19.35%)               | 0.57 (0.28,1.15) |         |
|                                         | Missing     | 950       | 261 (27.47%)              | 0.87 (0.59,1.27) |         |
| Cup Depth                               | Shallow     | 54        | 16 (29.63%)               | Reference        | 0.702   |
|                                         | Moderate    | 315       | 89 (28.25%)               | 0.93 (0.48,1.77) |         |
|                                         | deep        | 110       | 25 (22.73%)               | 0.71 (0.34,1.48) |         |
|                                         | Missing     | 945       | 259 (27.41%)              | 0.88 (0.47,1.67) |         |
| Rim plane position constant through 360 | No          | 69        | 16 (23.19%)               | Reference        | 0.657   |
|                                         | Yes         | 410       | 114 (27.80%)              | 1.33 (0.70,2.52) |         |
|                                         | Missing     | 945       | 259 (27.41%)              | 1.28 (0.70,2.35) |         |
| Beta PPA                                | No          | 157       | 36 (22.93%)               | Reference        | 0.239   |
|                                         | Yes         | 325       | 96 (29.54%)               | 1.43 (0.93,2.20) |         |
|                                         | Missing     | 942       | 257 (27.28%)              | 1.26 (0.85,1.87) |         |
| Tilted disc                             | No          | 441       | 121 (27.44%)              | Reference        | 0.984   |
|                                         | Yes         | 41        | 11 (26.83%)               | 0.95 (0.44,2.06) |         |
|                                         | Missing     | 942       | 257 (27.28%)              | 0.98 (0.75,1.28) |         |
| Disc hemorrhage                         | No          | 475       | 130 (27.37%)              | Reference        | 0.993   |
|                                         | Yes         | 7         | 2 (28.57%)                | 1.03 (0.19,5.70) |         |
|                                         | Missing     | 942       | 257 (27.28%)              | 0.99 (0.76,1.28) |         |
| Arteriole narrowing                     | No          | 473       | 131 (27.70%)              | Reference        | 0.389   |
|                                         | Yes         | 9         | 1 (11.11%)                | 0.31 (0.03,2.84) |         |
|                                         | Missing     | 942       | 257 (27.28%)              | 0.97 (0.75,1.26) |         |
| Venule narrowing                        | No          | 475       | 129 (27.16%)              | Reference        | 0.730   |
|                                         | Yes         | 7         | 3 (42.86%)                | 1.99 (0.44,8.95) |         |
|                                         | Missing     | 942       | 257 (27.28%)              | 1.00 (0.77,1.29) |         |

|                                    |         |     |              |                  |              |
|------------------------------------|---------|-----|--------------|------------------|--------------|
| Baring of the lamina cribrosa      | No      | 128 | 50 (39.06%)  | Reference        | <b>0.007</b> |
|                                    | Yes     | 354 | 82 (23.16%)  | 0.48 (0.32,0.73) |              |
|                                    | Missing | 942 | 257 (27.28%) | 0.59 (0.40,0.86) |              |
| Baring of the circumlinear vessels | No      | 340 | 90 (26.47%)  | Reference        | 0.843        |
|                                    | Yes     | 141 | 41 (29.08%)  | 1.14 (0.73,1.79) |              |
|                                    | Missing | 943 | 258 (27.36%) | 1.04 (0.77,1.39) |              |
| Vessels overpass                   | No      | 471 | 129 (27.39%) | Reference        | 0.654        |
|                                    | Yes     | 7   | 1 (14.29%)   | 0.43 (0.05,3.97) |              |
|                                    | Missing | 946 | 259 (27.38%) | 0.99 (0.76,1.28) |              |
| Bayonetting                        | No      | 319 | 91 (28.53%)  | Reference        | 0.648        |
|                                    | Yes     | 134 | 31 (23.13%)  | 0.76 (0.47,1.21) |              |
|                                    | 2       | 26  | 8 (30.77%)   | 1.15 (0.48,2.74) |              |
|                                    | Missing | 945 | 259 (27.41%) | 0.94 (0.70,1.26) |              |
| Nasalization of the vessels        | No      | 308 | 95 (30.84%)  | Reference        | 0.067        |
|                                    | Yes     | 174 | 37 (21.26%)  | 0.61 (0.39,0.93) |              |
|                                    | Missing | 942 | 257 (27.28%) | 0.83 (0.62,1.11) |              |
| Cilio-retinal vessels              | No      | 381 | 110 (28.87%) | Reference        | 0.298        |
|                                    | Yes     | 101 | 22 (21.78%)  | 0.68 (0.41,1.13) |              |
|                                    | Missing | 942 | 257 (27.28%) | 0.91 (0.70,1.20) |              |
| Gray crescent                      | No      | 445 | 124 (27.87%) | Reference        | 0.722        |
|                                    | Yes     | 37  | 8 (21.62%)   | 0.72 (0.32,1.66) |              |
|                                    | Missing | 942 | 257 (27.28%) | 0.96 (0.74,1.25) |              |
| Conus pigmentosus                  | No      | 434 | 122 (28.11%) | Reference        | 0.440        |
|                                    | Yes     | 48  | 10 (20.83%)  | 0.67 (0.35,1.29) |              |
|                                    | Missing | 942 | 257 (27.28%) | 0.95 (0.73,1.24) |              |
| Notching of neural rim             | No      | 449 | 126 (28.06%) | Reference        | 0.111        |
|                                    | Yes     | 30  | 4 (13.33%)   | 0.39 (0.13,1.14) |              |
|                                    | Missing | 945 | 259 (27.41%) | 0.96 (0.74,1.24) |              |
| Pallor of the neural rim           | No      | 475 | 131 (27.58%) | Reference        | 0.727        |
|                                    | Yes     | 7   | 1 (14.29%)   | 0.48 (0.06,3.67) |              |
|                                    | Missing | 942 | 257 (27.28%) | 0.98 (0.75,1.26) |              |

OR=odds ratio; CI=confidence interval

**Table 4:** Univariable analysis for demographic risk factors for increasing RNFL progression rate

|                                             | Levels  | # of eyes | Rate of RNFL progression ( $\mu\text{m}/\text{y}$ ) Mean (SE) | Difference (95% CI) | P-value |
|---------------------------------------------|---------|-----------|---------------------------------------------------------------|---------------------|---------|
| Age group                                   | <=60    | 304       | -1.71 (0.09)                                                  | Reference           | 0.83    |
|                                             | (60,70] | 415       | -1.65 (0.05)                                                  | 0.06 (-0.15,0.27)   |         |
|                                             | >70     | 609       | -1.65 (0.05)                                                  | 0.06 (-0.14,0.26)   |         |
|                                             | missing | 96        | -                                                             | -                   |         |
| Age at enrollment (per 1 year increase)     |         |           |                                                               | 0.00 (-0.00,0.01)   | 0.44    |
| sex                                         | Male    | 648       | -1.71 (0.07)                                                  | Reference           | .032    |
|                                             | Female  | 772       | -1.64 (0.03)                                                  | 0.08 (-0.07,0.22)   |         |
|                                             | NA      | 4         | -                                                             | -                   |         |
| BMI group ( $\text{kg}/\text{m}^2$ )        | < 25    | 262       | -1.64 (0.07)                                                  | Reference           | 0.16    |
|                                             | 25-30   | 466       | -1.60 (0.04)                                                  | 0.03 (-0.12,0.19)   |         |
|                                             | >=30    | 563       | -1.75 (0.06)                                                  | -0.11 (-0.29,0.06)  |         |
|                                             | missing | 133       | -                                                             | -                   |         |
| BMI (per 1 $\text{kg}/\text{m}^2$ increase) |         |           |                                                               | -0.01 (-0.02,0.00)  | 0.22    |
| Diabetes                                    | No      | 735       | -1.69 (0.05)                                                  | Reference           | .044    |
|                                             | Yes     | 558       | -1.64 (0.05)                                                  | 0.05 (-0.08,0.18)   |         |
|                                             | NA      | 131       | -                                                             | -                   |         |
| Hypertension                                | No      | 228       | -1.68 (0.07)                                                  | Reference           | .086    |
|                                             | Yes     | 1067      | -1.67 (0.04)                                                  | 0.01 (-0.14,0.16)   |         |
|                                             | NA      | 129       | -                                                             | -                   |         |
| Family glaucoma history                     | No      | 487       | -1.73 (0.07)                                                  | Reference           | .027    |
|                                             | Yes     | 713       | -1.64 (0.04)                                                  | 0.09 (-0.07,0.25)   |         |
|                                             | NA      | 224       | -                                                             | -                   |         |
| Alcohol use                                 | No      | 569       | -1.63 (0.03)                                                  | Reference           | .014    |
|                                             | Yes     | 661       | -1.71 (0.04)                                                  | -0.08 (-0.18,0.03)  |         |
|                                             | NA      | 194       | -                                                             | -                   |         |
| Tobacco use                                 | No      | 538       | -1.66 (0.04)                                                  | Reference           | .073    |
|                                             | Yes     | 694       | -1.68 (0.04)                                                  | -0.02 (-0.12,0.09)  |         |
|                                             | NA      | 192       | -                                                             | -                   |         |
| Previous glaucoma surgery                   | No      | 895       | -1.70 (0.03)                                                  | Reference           | .050    |
|                                             | Yes     | 383       | -1.64 (0.08)                                                  | 0.06 (-0.11,0.23)   |         |
|                                             | NA      | 146       | -                                                             | -                   |         |

|               |         |      |              |                    |      |
|---------------|---------|------|--------------|--------------------|------|
| <i>LMX1B</i>  | GC      | 27   | -1.39 (0.31) | Reference          | .    |
|               | GG      | 1127 | -1.68 (0.04) | -0.29 (-0.90,0.32) | 0.36 |
|               | missing | 270  | -            | -                  | .    |
| <i>TRIM66</i> | TC      | 146  | -1.77 (0.19) | Reference          | .    |
|               | TT      | 1004 | -1.65 (0.03) | 0.11 (-0.26,0.48)  | 0.55 |
|               | missing | 274  | -            | -                  | .    |

RNFL=retinal nerve fiber layer; CI=confidence interval; BMI=body mass index

**Table 5:** Univariable analysis of clinical risk factors of increasing RNFL progression rate

|                                       | # of eyes | Regression Coefficient for rate of RNFL change (95% CI) | P-value |
|---------------------------------------|-----------|---------------------------------------------------------|---------|
| CCT (per 10 $\mu\text{m}$ /increase)  | 1228      | -0.00 (-0.02,0.01)                                      | 0.766   |
| CDR (per 0.1 increase)                | 863       | 0.12 (0.08,0.16)                                        | <.001   |
| IOP (per 1 mmHg increase)             | 1148      | -0.00 (-0.02,0.01)                                      | 0.622   |
| MD (per 1 dB increase)                | 1004      | -0.04 (-0.05, -0.03)                                    | <.001   |
| PSD (per 1 dB increase)               | 1001      | 0.09 (0.06,0.11)                                        | <.001   |
| RNFL (per 10 $\mu\text{m}$ /increase) | 1424      | -0.54 (-0.60, -0.47)                                    | <.001   |
| VA (per 0.1 logMAR increase)          | 727       | 0.03 (0.01,0.06)                                        | 0.007   |

OR=odds ratio; CI=confidence interval; CCT=central corneal thickness; CDR=cup-to-disc ratio; IOP=intraocular pressure; MD=mean deviation; PSD=pattern standard deviation; RNFL=retinal nerve fiber layer thickness; VA=visual acuity



**Table 6:** Univariable analysis for qualitative phenotypes risk factors of increasing RNFL progression rate

|                                         |             | # of eyes | Rate of RNFL progression (um/y) Mean (SE) | Difference (95% CI)  | P value |
|-----------------------------------------|-------------|-----------|-------------------------------------------|----------------------|---------|
| Disc shape                              | Round       | 243       | -1.54 (0.05)                              | Reference            | 0.004   |
|                                         | Oval        | 237       | -1.80 (0.05)                              | -0.26 (-0.41, -0.11) |         |
|                                         | Missing     | 944       | -1.67 (0.05)                              | -0.13 (-0.28,0.01)   |         |
| Disc Size                               | Abnormal    | 3         | -1.46 (0.20)                              | Reference            | 0.742   |
|                                         | Normal      | 479       | -1.67 (0.03)                              | -0.21 (-0.61,0.19)   |         |
|                                         | Missing     | 942       | -1.67 (0.05)                              | -0.22 (-0.63,0.19)   |         |
| Shape of cup                            | Conical     | 156       | -1.66 (0.05)                              | Reference            | 0.695   |
|                                         | Cylindrical | 256       | -1.71 (0.05)                              | -0.05 (-0.20,0.10)   |         |
|                                         | Bean Pot    | 62        | -1.56 (0.11)                              | 0.10 (-0.15,0.34)    |         |
|                                         | Missing     | 950       | -1.67 (0.05)                              | -0.01 (-0.15,0.14)   |         |
| Cup Depth                               | Shallow     | 54        | -1.59 (0.09)                              | Reference            | 0.692   |
|                                         | Moderate    | 315       | -1.70 (0.04)                              | -0.11 (-0.29,0.08)   |         |
|                                         | deep        | 110       | -1.64 (0.07)                              | -0.05 (-0.27,0.16)   |         |
|                                         | Missing     | 945       | -1.67 (0.05)                              | -0.08 (-0.28,0.11)   |         |
| Rim plane position constant through 360 | No          | 69        | -1.70 (0.07)                              | Reference            | 0.900   |
|                                         | Yes         | 410       | -1.66 (0.04)                              | 0.04 (-0.12,0.20)    |         |
|                                         | Missing     | 945       | -1.67 (0.05)                              | 0.03 (-0.14,0.20)    |         |
| Beta PPA                                | No          | 157       | -1.52 (0.06)                              | Reference            | 0.014   |
|                                         | Yes         | 325       | -1.74 (0.04)                              | -0.22 (-0.36, -0.08) |         |
|                                         | Missing     | 942       | -1.67 (0.05)                              | -0.15 (-0.31, -0.00) |         |
| Tilted disc                             | No          | 441       | -1.65 (0.04)                              | Reference            | 0.502   |
|                                         | Yes         | 41        | -1.80 (0.11)                              | -0.14 (-0.37,0.09)   |         |
|                                         | Missing     | 942       | -1.67 (0.05)                              | -0.02 (-0.14,0.10)   |         |
| Disc hemorrhage                         | No          | 475       | -1.66 (0.03)                              | Reference            | 0.799   |
|                                         | Yes         | 7         | -2.03 (0.56)                              | -0.37 (-1.48,0.74)   |         |
|                                         | Missing     | 942       | -1.67 (0.05)                              | -0.01 (-0.13,0.11)   |         |
| Arteriole narrowing                     | No          | 473       | -1.67 (0.03)                              | Reference            | 0.339   |
|                                         | Yes         | 9         | -1.43 (0.14)                              | 0.25 (-0.05,0.54)    |         |
|                                         | Missing     | 942       | -1.67 (0.05)                              | -0.00 (-0.12,0.12)   |         |

|                                    |          |     |              |                    |       |
|------------------------------------|----------|-----|--------------|--------------------|-------|
| Venule narrowing                   | No       | 475 | -1.66 (0.03) | Reference          | 0.875 |
|                                    | Yes      | 7   | -1.80 (0.26) | -0.14 (-0.65,0.38) |       |
|                                    | Missing  | 942 | -1.67 (0.05) | -0.01 (-0.13,0.11) |       |
| Baring of the lamina cribrosa      | No       | 128 | -1.79 (0.06) | Reference          | 0.090 |
|                                    | Yes      | 354 | -1.62 (0.04) | 0.17 (0.02,0.32)   |       |
|                                    | Missing  | 942 | -1.67 (0.05) | 0.12 (-0.04,0.28)  |       |
| Baring of the circumlinear vessels | No       | 340 | -1.68 (0.04) | Reference          | 0.838 |
|                                    | Yes      | 141 | -1.63 (0.07) | 0.05 (-0.12,0.22)  |       |
|                                    | Missing  | 943 | -1.67 (0.05) | 0.01 (-0.12,0.13)  |       |
| Vessels overpass                   | No       | 471 | -1.68 (0.03) | Reference          | 0.828 |
|                                    | Yes      | 7   | -1.41 (0.43) | 0.27 (-0.57,1.11)  |       |
|                                    | Missing  | 946 | -1.67 (0.05) | 0.01 (-0.11,0.12)  |       |
| Bayonetting                        | No       | 319 | -1.69 (0.04) | Reference          | 0.711 |
|                                    | Moderate | 134 | -1.61 (0.06) | 0.08 (-0.07,0.23)  |       |
|                                    | Severe   | 26  | -1.77 (0.20) | -0.08 (-0.49,0.33) |       |
|                                    | Missing  | 945 | -1.67 (0.05) | 0.02 (-0.11,0.14)  |       |
| Nasalization of the vessels        | No       | 308 | -1.75 (0.04) | Reference          | 0.012 |
|                                    | Yes      | 174 | -1.52 (0.06) | 0.24 (0.09,0.39)   |       |
|                                    | Missing  | 942 | -1.67 (0.05) | 0.08 (-0.05,0.21)  |       |
| Cilio-retinal vessels              | No       | 381 | -1.68 (0.04) | Reference          | 0.854 |
|                                    | Yes      | 101 | -1.63 (0.07) | 0.04 (-0.11,0.20)  |       |
|                                    | Missing  | 942 | -1.67 (0.05) | 0.00 (-0.12,0.13)  |       |
| Gray crescent                      | No       | 445 | -1.65 (0.04) | Reference          | 0.515 |
|                                    | Yes      | 37  | -1.81 (0.13) | -0.16 (-0.42,0.11) |       |
|                                    | Missing  | 942 | -1.67 (0.05) | -0.02 (-0.14,0.10) |       |
| Conus pigmentosus                  | No       | 434 | -1.69 (0.03) | Reference          | 0.202 |
|                                    | Yes      | 48  | -1.48 (0.11) | 0.21 (-0.01,0.43)  |       |
|                                    | Missing  | 942 | -1.67 (0.05) | 0.01 (-0.11,0.14)  |       |
| Notching of neural rim             | No       | 449 | -1.69 (0.03) | Reference          | 0.257 |
|                                    | Yes      | 30  | -1.41 (0.16) | 0.28 (-0.04,0.59)  |       |
|                                    | Missing  | 945 | -1.67 (0.05) | 0.02 (-0.10,0.14)  |       |
| Pallor of the neural rim           | No       | 475 | -1.67 (0.03) | Reference          | 0.943 |
|                                    | Yes      | 7   | -1.60 (0.21) | 0.07 (-0.35,0.49)  |       |
|                                    | Missing  | 942 | -1.67 (0.05) | -0.00 (-0.13,0.12) |       |

OR=odds ratio; CI=confidence interval

**Table 7:** Univariable analysis of demographic risk factors of being a moderate or fast functional progressor

|                                      | levels  | N    | # of fast progressors (%) | OR (95% CI)      | P value |
|--------------------------------------|---------|------|---------------------------|------------------|---------|
| Age (years)                          | <=60    | 304  | 26 (8.55%)                | Ref              | 0.517   |
|                                      | (60,70] | 415  | 48 (11.57%)               | 1.41 (0.77,2.59) |         |
|                                      | >70     | 609  | 62 (10.18%)               | 1.19 (0.66,2.13) |         |
|                                      | Missing | 96   | 32 (33.33%)               | -                |         |
| Age (per 10 year increase)           |         |      |                           | 0.97 (0.81,1.17) | 0.782   |
| Sex                                  | Male    | 648  | 95 (14.66%)               | Ref              | 0.008   |
|                                      | Female  | 772  | 73 (9.46%)                | 0.59 (0.40,0.87) |         |
|                                      | Missing | 4    | 0 (0.00%)                 | -                |         |
| BMI (kg/m <sup>2</sup> )             | < 25    | 262  | 33 (12.60%)               | Ref              | 0.668   |
|                                      | 25-30   | 466  | 45 (9.66%)                | 0.77 (0.44,1.37) |         |
|                                      | >=30    | 563  | 58 (10.30%)               | 0.83 (0.49,1.42) |         |
|                                      | Missing | 133  | 32 (24.06%)               | -                |         |
| BMI (per 1 kg/m <sup>2</sup> change) |         |      |                           | 0.99 (0.95,1.03) | 0.464   |
| Diabetes                             | No      | 735  | 75 (10.20%)               | Ref              | 0.674   |
|                                      | Yes     | 558  | 62 (11.11%)               | 1.09 (0.72,1.66) |         |
|                                      | Missing | 131  | 31 (23.66%)               | -                |         |
| Hypertension                         | No      | 228  | 17 (7.46%)                | Ref              | 0.146   |
|                                      | Yes     | 1067 | 120 (11.25%)              | 1.57 (0.85,2.87) |         |
|                                      | Missing | 129  | 31 (24.03%)               | -                |         |
| Family glaucoma history              | No      | 487  | 54 (11.09%)               | Ref              | 0.588   |
|                                      | Yes     | 713  | 70 (9.82%)                | 0.89 (0.57,1.37) |         |
|                                      | Missing | 224  | 44 (19.64%)               | -                |         |
| Alcohol use                          | No      | 569  | 54 (9.49%)                | Ref              | 0.278   |
|                                      | Yes     | 661  | 50 (7.56%)                | 0.78 (0.49,1.23) |         |
|                                      | Missing | 194  | 64 (32.99%)               | -                |         |
| Tobacco use                          | No      | 538  | 46 (8.55%)                | Ref              | 0.801   |
|                                      | Yes     | 694  | 57 (8.21%)                | 0.94 (0.59,1.50) |         |
|                                      | Missing | 192  | 65 (33.85%)               | -                |         |
| Previous glaucoma surgery            | No      | 895  | 75 (8.38%)                | Ref              | 0.004   |
|                                      | Yes     | 383  | 56 (14.62%)               | 1.90 (1.23,2.92) |         |
|                                      | Missing | 146  | 37 (25.34%)               | -                |         |
| LMX1B                                | GC      | 27   | 8 (29.63%)                | Ref              | 0.011   |

|               |         |      |              |                  |       |
|---------------|---------|------|--------------|------------------|-------|
|               | GG      | 1127 | 123 (10.91%) | 0.28 (0.10,0.75) |       |
|               | Missing | 270  | 37 (13.70%)  | -                |       |
| <i>TRIM66</i> | TC      | 146  | 28 (19.18%)  | Ref              | 0.015 |
|               | TT      | 1004 | 102 (10.16%) | 0.50 (0.28,0.88) |       |
|               | Missing | 274  | 38 (13.87%)  | -                |       |

OR=odds ratio; CI=confidence interval; BMI=body mass index

**Table 8:** Univariable analysis for ocular risk factors for being a moderate or fast functional progressor

|                                | # of eyes | # of fast functional progressors (%) | OR (95%CI)       | P value |
|--------------------------------|-----------|--------------------------------------|------------------|---------|
| CCT (per 10 $\mu$ m/increase)  | 1228      | 139 (11.32%)                         | 1.01 (0.96,1.07) | 0.636   |
| CDR (per 0.1 increase)         | 607       | 27 (4.45%)                           | 0.91 (0.72,1.15) | 0.428   |
| IOP (per 1 mmHg increase)      | 936       | 68 (7.26%)                           | 1.05 (1.03,1.08) | <.001   |
| MD (per 1 dB increase)         | 1424      | 168 (11.80%)                         | 1.01 (0.98,1.04) | 0.469   |
| PSD (per 1 dB increase)        | 1417      | 168 (11.86%)                         | 1.03 (0.98,1.08) | 0.195   |
| RNFL (per 10 $\mu$ m/increase) | 628       | 31 (4.94%)                           | 1.00 (0.74,1.36) | 0.990   |
| VA (per 0.1 logMAR increase)   | 532       | 20 (3.76%)                           | 1.05 (0.92,1.19) | 0.462   |

OR=odds ratio; CI=confidence interval; CCT=central corneal thickness; CDR=cup-to-disc ratio; IOP=intraocular pressure; MD=mean deviation; PSD=pattern standard deviation; RNFL=retinal nerve fiber layer thickness; VA=visual acuity

**Table 9:** Univariable analysis for qualitative phenotype risk factors for being a moderate or fast functional progressor

|                                         | Level       | # of eyes | # of moderate or fast progressors (%) | OR (95% CL)            | P value |
|-----------------------------------------|-------------|-----------|---------------------------------------|------------------------|---------|
| Disc shape                              | Round       | 140       | 5 (3.57%)                             | Reference              | 0.486   |
|                                         | Oval        | 156       | 8 (5.13%)                             | 1.50 (0.48,4.65)       |         |
|                                         | Missing     | 1128      | 155 (13.74%)                          | -                      |         |
| Disc Size                               | Recorded    | 297       | 13 (4.38%)                            | -                      | .       |
|                                         | Missing     | 1127      | 155 (13.75%)                          | -                      |         |
| Shape of cup                            | Conical     | 101       | 6 (5.94%)                             | Reference              | 0.717   |
|                                         | Cylindrical | 152       | 6 (3.95%)                             | 0.69 (0.22,2.16)       |         |
|                                         | Bean Pot    | 34        | 1 (2.94%)                             | 0.48 (0.06,4.17)       |         |
|                                         | Missing     | 1137      | 155 (13.63%)                          | -                      |         |
| Cup Depth                               | Shallow     | 21        | 2 (9.52%)                             | Reference              | 0.460   |
|                                         | Moderate    | 195       | 8 (4.10%)                             | 0.39 (0.08,1.85)       |         |
|                                         | deep        | 77        | 3 (3.90%)                             | 0.37 (0.06,2.21)       |         |
|                                         | Missing     | 1131      | 155 (13.70%)                          | -                      |         |
| Rim plane position constant through 360 | No          | 53        | 2 (3.77%)                             | Reference              | 0.768   |
|                                         | Yes         | 240       | 11 (4.58%)                            | 1.26 (0.27,6.00)       |         |
|                                         | Missing     | 1131      | 155 (13.70%)                          | -                      |         |
| Beta PPA                                | No          | 80        | 6 (7.50%)                             | Reference              | 0.113   |
|                                         | Yes         | 216       | 7 (3.24%)                             | 0.41 (0.14,1.23)       |         |
|                                         | Missing     | 1128      | 155 (13.74%)                          | -                      |         |
| Tilted disc                             | No          | 264       | 9 (3.41%)                             | Reference              | 0.031   |
|                                         | Yes         | 32        | 4 (12.50%)                            | 4.01<br>(1.14,14.13)   |         |
|                                         | Missing     | 1128      | 155 (13.74%)                          | -                      |         |
| Disc hemorrhage                         | No          | 295       | 13 (4.41%)                            | -                      |         |
|                                         | Yes         | 2         | 0 (0.00%)                             | -                      |         |
|                                         | Missing     | 1127      | 155 (13.75%)                          | -                      |         |
| Arteriole narrowing                     | No          | 295       | 12 (4.07%)                            | Reference              | 0.030   |
|                                         | Yes         | 2         | 1 (50.00%)                            | 23.12<br>(1.36,392.27) |         |
|                                         | Missing     | 1127      | 155 (13.75%)                          | -                      |         |

|                                    |         |      |              |                   |       |
|------------------------------------|---------|------|--------------|-------------------|-------|
| Venule narrowing                   | No      | 293  | 13 (4.44%)   | -                 |       |
|                                    | Yes     | 4    | 0 (0.00%)    | -                 |       |
|                                    | Missing | 1127 | 155 (13.75%) | -                 |       |
| Baring of the lamina cribrosa      | No      | 85   | 6 (7.06%)    | Reference         | 0.171 |
|                                    | Yes     | 212  | 7 (3.30%)    | 0.46 (0.15,1.40)  |       |
|                                    | Missing | 1127 | 155 (13.75%) | -                 |       |
| Baring of the circumlinear vessels | No      | 208  | 11 (5.29%)   | Reference         | 0.243 |
|                                    | Yes     | 88   | 2 (2.27%)    | 0.40 (0.09,1.85)  |       |
|                                    | Missing | 1128 | 155 (13.74%) | -                 |       |
| Vessels overpass                   | No      | 292  | 13 (4.45%)   | Reference         | .     |
|                                    | Missing | 1132 | 155 (13.69%) | -                 |       |
| Bayonetting                        | No      | 205  | 10 (4.88%)   | Reference         | 0.652 |
|                                    | Yes     | 75   | 2 (2.67%)    | 0.55 (0.12,2.51)  |       |
|                                    | 2       | 13   | 1 (7.69%)    | 1.58 (0.18,14.06) |       |
|                                    | Missing | 1131 | 155 (13.70%) | -                 |       |
| Nasalization of the vessels        | No      | 195  | 11 (5.64%)   | Reference         | 0.165 |
|                                    | Yes     | 101  | 2 (1.98%)    | 0.35 (0.08,1.54)  |       |
|                                    | Missing | 1128 | 155 (13.74%) | -                 |       |
| Cilio-retinal vessels              | No      | 243  | 12 (4.94%)   | Reference         | 0.328 |
|                                    | Yes     | 54   | 1 (1.85%)    | 0.35 (0.04,2.90)  |       |
|                                    | Missing | 1127 | 155 (13.75%) | -                 |       |
| Gray crescent                      | No      | 272  | 13 (4.78%)   | -                 |       |
|                                    | Yes     | 25   | 0 (0.00%)    | -                 |       |
|                                    | Missing | 1127 | 155 (13.75%) | -                 |       |
| Conus pigmentosus                  | No      | 269  | 13 (4.83%)   | -                 |       |
|                                    | Yes     | 28   | 0 (0.00%)    | -                 |       |
|                                    | Missing | 1127 | 155 (13.75%) | -                 |       |
| Notching of neural rim             | No      | 271  | 13 (4.80%)   | -                 |       |
|                                    | Yes     | 22   | 0 (0.00%)    | -                 |       |
|                                    | Missing | 1131 | 155 (13.70%) | -                 |       |
| Pallor of the neural rim           | No      | 291  | 13 (4.47%)   | -                 |       |
|                                    | Yes     | 6    | 0 (0.00%)    | -                 |       |
|                                    | Missing | 1127 | 155 (13.75%) | -                 |       |

OR=odds ratio; CI=confidence interval

**Table 10:** Univariable analysis for demographic risk factors of increasing MD rate of change

|                                          | Levels  | N    | Rate of RNFL change Mean (SE) | Difference (95% CI)     | P-value |
|------------------------------------------|---------|------|-------------------------------|-------------------------|---------|
| Age (years)                              | <=60    | 304  | -0.38 (0.01)                  | Reference               | 0.18    |
|                                          | (60,70] | 415  | -0.41 (0.01)                  | -0.03 (-0.07,0.00)      |         |
|                                          | >70     | 609  | -0.40 (0.01)                  | -0.02 (-0.05,0.01)      |         |
|                                          | Missing | 96   | -                             | -                       |         |
| Age at enrollment (per 10-year increase) |         |      |                               | -0.00 (-0.01, 0.01)     | 0.92    |
| sex                                      | Male    | 648  | -0.41 (0.01)                  | Reference               | 0.13    |
|                                          | Female  | 772  | -0.39 (0.01)                  | 0.02 (-0.01,0.04)       |         |
|                                          | Missing | 4    | -                             | -                       |         |
| BMI (kg/m <sup>2</sup> )                 | < 25    | 262  | -0.42 (0.01)                  | Reference               | 0.13    |
|                                          | 25-30   | 466  | -0.40 (0.01)                  | 0.02 (-0.01,0.05)       |         |
|                                          | >=30    | 563  | -0.39 (0.01)                  | 0.03 (0.00,0.07)        |         |
|                                          | Missing | 133  | -                             | -                       |         |
| BMI (per kg/m <sup>2</sup> increase)     |         |      |                               | 0.0027 (0.0006, 0.0048) | 0.01    |
| Diabetes                                 | No      | 735  | -0.40 (0.01)                  | Reference               | 0.81    |
|                                          | Yes     | 558  | -0.40 (0.01)                  | 0.00 (-0.02,0.02)       |         |
|                                          | Missing | 131  | -                             | -                       |         |
| Hypertension                             | No      | 228  | -0.39 (0.01)                  | Reference               | 0.71    |
|                                          | Yes     | 1067 | -0.40 (0.01)                  | -0.00 (-0.03,0.02)      |         |
|                                          | Missing | 129  | -                             | -                       |         |
| Family glaucoma history                  | No      | 487  | -0.40 (0.01)                  | Reference               | 0.98    |
|                                          | Yes     | 713  | -0.40 (0.01)                  | -0.00 (-0.02,0.02)      |         |
|                                          | Missing | 224  | -                             | -                       |         |
| Alcohol use                              | No      | 569  | -0.39 (0.01)                  | Reference               | 0.77    |
|                                          | Yes     | 661  | -0.39 (0.01)                  | 0.00 (-0.02,0.02)       |         |
|                                          | Missing | 194  | -                             | -                       |         |
| Tobacco use                              | No      | 538  | -0.39 (0.01)                  | Reference               | 0.72    |
|                                          | Yes     | 694  | -0.39 (0.01)                  | -0.00 (-0.02,0.02)      |         |
|                                          | Missing | 192  | -                             | -                       |         |
| Previous glaucoma surgery                | No      | 895  | -0.39 (0.01)                  | Reference               | 0.22    |
|                                          | Yes     | 383  | -0.41 (0.01)                  | -0.02 (-0.05,0.01)      |         |
|                                          | Missing | 146  | -                             | -                       |         |



|               |         |      |              |                   |      |
|---------------|---------|------|--------------|-------------------|------|
| <i>LMX1B</i>  | GC      | 27   | -0.47 (0.03) | Reference         | .    |
|               | GG      | 1127 | -0.40 (0.01) | 0.06 (-0.00,0.13) | 0.07 |
|               | Missing | 270  | -            | -                 | .    |
| <i>TRIM66</i> | TC      | 146  | -0.43 (0.02) | Reference         | .    |
|               | TT      | 1004 | -0.40 (0.01) | 0.03 (-0.00,0.07) | 0.06 |
|               | Missing | 274  | -            | -                 | .    |

MD=mean deviation; OR=odds ratio; CI=confidence interval; BMI=body mass index

**Table 11:** Univariable analysis for ocular risk factors of increasing MD progression rate

|                                       | <b># of eyes</b> | <b>Regression Coefficient for rate of MD change (95% CI)</b> | <b>P-value*</b> |
|---------------------------------------|------------------|--------------------------------------------------------------|-----------------|
| CCT (per 10 $\mu\text{m}$ /increase)  | 1228             | -0.002 (-0.005,0.001)                                        | 0.160           |
| CDR (per 0.1 increase)                | 607              | 0.008 (0.004,0.012)                                          | <.001           |
| IOP (per 1 mmHg increase)             | 936              | -0.001 (-0.003,0.001)                                        | 0.418           |
| MD (per 1 dB increase)                | 1424             | -0.006 (-0.008,-0.003)                                       | <.001           |
| PSD (per 1 dB increase)               | 1417             | 0.000 (-0.002,0.003)                                         | 0.772           |
| RNFL (per 10 $\mu\text{m}$ /increase) | 628              | -0.015 (-0.029,-0.002)                                       | 0.025           |
| VA (per 0.1 logMAR increase)          | 532              | 0.001 (-0.001,0.003)                                         | 0.451           |

OR=odds ratio; CI=confidence interval; CCT=central corneal thickness; CDR=cup-to-disc ratio; IOP=intraocular pressure; MD=mean deviation; PSD=pattern standard deviation; RNFL=retinal nerve fiber layer thickness; VA=visual acuity

**Table 12:** Univariable analysis for qualitative phenotype risk factors of increasing MD rate of change

|                                         |             | <b>N</b> | <b>Rate of MD progression (dB/y) Mean (SE)</b> | <b>Difference (95% CI)</b> | <b>P value</b> |
|-----------------------------------------|-------------|----------|------------------------------------------------|----------------------------|----------------|
| Disc shape                              | Round       | 140      | -0.40 (0.01)                                   | Reference                  | 0.985          |
|                                         | Oval        | 156      | -0.40 (0.01)                                   | 0.00 (-0.01,0.02)          |                |
|                                         | Missing     | 1128     | -0.40 (0.01)                                   | 0.00 (-0.02,0.02)          |                |
| Disc Size                               | Abnormal    | 3        | -0.41 (0.01)                                   | Reference                  | 0.603          |
|                                         | Normal      | 294      | -0.40 (0.00)                                   | 0.01 (-0.01,0.03)          |                |
|                                         | Missing     | 1127     | -0.40 (0.01)                                   | 0.01 (-0.01,0.04)          |                |
| Shape of cup                            | Conical     | 101      | -0.42 (0.01)                                   | Reference                  | 0.078          |
|                                         | Cylindrical | 152      | -0.40 (0.01)                                   | 0.02 (0.00,0.03)           |                |
|                                         | Bean Pot    | 34       | -0.39 (0.01)                                   | 0.03 (0.00,0.06)           |                |
|                                         | Missing     | 1137     | -0.40 (0.01)                                   | 0.01 (-0.00,0.03)          |                |
| Cup Depth                               | Shallow     | 21       | -0.42 (0.01)                                   | Reference                  | 0.144          |
|                                         | Moderate    | 195      | -0.41 (0.00)                                   | 0.01 (-0.02,0.04)          |                |
|                                         | deep        | 77       | -0.39 (0.01)                                   | 0.03 (-0.00,0.06)          |                |
|                                         | Missing     | 1131     | -0.40 (0.01)                                   | 0.01 (-0.02,0.04)          |                |
| Rim plane position constant through 360 | No          | 53       | -0.41 (0.01)                                   | Reference                  | 0.294          |
|                                         | Yes         | 240      | -0.40 (0.00)                                   | 0.01 (-0.00,0.02)          |                |
|                                         | Missing     | 1131     | -0.40 (0.01)                                   | 0.01 (-0.01,0.03)          |                |
| Beta PPA                                | No          | 80       | -0.40 (0.01)                                   | Reference                  | 0.996          |
|                                         | Yes         | 216      | -0.40 (0.00)                                   | 0.00 (-0.02,0.02)          |                |
|                                         | Missing     | 1128     | -0.40 (0.01)                                   | 0.00 (-0.02,0.02)          |                |
| Tilted disc                             | No          | 264      | -0.40 (0.00)                                   | Reference                  | 0.362          |
|                                         | Yes         | 32       | -0.42 (0.01)                                   | -0.02 (-0.04,0.01)         |                |
|                                         | Missing     | 1128     | -0.40 (0.01)                                   | -0.00 (-0.02,0.01)         |                |
| Disc hemorrhage                         | No          | 295      | -0.40 (0.00)                                   | Reference                  | 0.891          |
|                                         | Yes         | 2        | -0.39 (0.02)                                   | 0.01 (-0.02,0.04)          |                |
|                                         | Missing     | 1127     | -0.40 (0.01)                                   | -0.00 (-0.02,0.02)         |                |

|                                    |          |      |              |                     |       |
|------------------------------------|----------|------|--------------|---------------------|-------|
| Arteriole narrowing                | No       | 295  | -0.40 (0.00) | Reference           | 0.431 |
|                                    | Yes      | 2    | -0.52 (0.04) | -0.12 (-0.20,-0.05) |       |
|                                    | Missing  | 1127 | -0.40 (0.01) | -0.00 (-0.02,0.02)  |       |
| Venule narrowing                   | No       | 293  | -0.40 (0.00) | Reference           | 0.457 |
|                                    | Yes      | 4    | -0.34 (0.04) | 0.06 (-0.01,0.14)   |       |
|                                    | Missing  | 1127 | -0.40 (0.01) | 0.00 (-0.02,0.02)   |       |
| Baring of the lamina cribrosa      | No       | 85   | -0.41 (0.01) | Reference           | 0.169 |
|                                    | Yes      | 212  | -0.40 (0.00) | 0.02 (-0.00,0.03)   |       |
|                                    | Missing  | 1127 | -0.40 (0.01) | 0.01 (-0.01,0.03)   |       |
| Baring of the circumlinear vessels | No       | 208  | -0.40 (0.00) | Reference           | 0.822 |
|                                    | Yes      | 88   | -0.40 (0.01) | 0.00 (-0.01,0.02)   |       |
|                                    | Missing  | 1128 | -0.40 (0.01) | 0.00 (-0.02,0.02)   |       |
| Vessels overpass                   | No       | 292  | -0.40 (0.00) | Reference           | 0.957 |
|                                    | Yes      | 0    | -            | -                   |       |
|                                    | Missing  | 1132 | -0.40 (0.01) | 0.00 (-0.02,0.02)   |       |
| Bayonetting                        | No       | 205  | -0.40 (0.00) | Reference           | 0.436 |
|                                    | Moderate | 75   | -0.39 (0.01) | 0.01 (-0.00,0.03)   |       |
|                                    | Severe   | 13   | -0.42 (0.01) | -0.02 (-0.05,0.01)  |       |
|                                    | Missing  | 1131 | -0.40 (0.01) | 0.00 (-0.01,0.02)   |       |
| Nasalization of the vessels        | No       | 195  | -0.41 (0.01) | Reference           | 0.539 |
|                                    | Yes      | 101  | -0.39 (0.01) | 0.01 (-0.01,0.03)   |       |
|                                    | Missing  | 1128 | -0.40 (0.01) | 0.00 (-0.01,0.02)   |       |
| Cilio-retinal vessels              | No       | 243  | -0.40 (0.00) | Reference           | 0.158 |
|                                    | Yes      | 54   | -0.39 (0.01) | 0.02 (0.00,0.03)    |       |
|                                    | Missing  | 1127 | -0.40 (0.01) | 0.00 (-0.01,0.02)   |       |
| Gray crescent                      | No       | 272  | -0.40 (0.00) | Reference           | 0.762 |
|                                    | Yes      | 25   | -0.39 (0.01) | 0.01 (-0.01,0.03)   |       |
|                                    | Missing  | 1127 | -0.40 (0.01) | 0.00 (-0.02,0.02)   |       |
| Conus pigmentosus                  | No       | 269  | -0.40 (0.00) | Reference           | 0.950 |
|                                    | Yes      | 28   | -0.40 (0.01) | 0.00 (-0.01,0.02)   |       |
|                                    | Missing  | 1127 | -0.40 (0.01) | 0.00 (-0.02,0.02)   |       |
| Notching of neural rim             | No       | 271  | -0.40 (0.00) | Reference           | 0.624 |
|                                    | Yes      | 22   | -0.39 (0.01) | 0.02 (-0.02,0.05)   |       |
|                                    | Missing  | 1131 | -0.40 (0.01) | 0.00 (-0.01,0.02)   |       |

|                          |         |      |              |                   |       |
|--------------------------|---------|------|--------------|-------------------|-------|
| Pallor of the neural rim | No      | 291  | -0.40 (0.00) | Reference         | 0.607 |
|                          | Yes     | 6    | -0.38 (0.02) | 0.02 (-0.01,0.06) |       |
|                          | Missing | 1127 | -0.40 (0.01) | 0.00 (-0.02,0.02) |       |

MD=mean deviation; OR=odds ratio; CI=confidence interval
